# Supplementary material for: High-temperature Corrosion of ~ 30 Pct Porous FeCr Stainless Steels in Air: Long-Term Evaluation Up to Breakaway
Source: Springer Nature journal article supplement (doi:10.1007/s11661-023-07005-z), 2023-02-27
Supplement: MOESM1 [file 24072738]

**Supplementary material for:  
High-temperature Corrosion of ~30% Porous FeCr Stainless Steels in Air: Long-term Evaluation up to Breakaway**

D. Koszelow<sup>a</sup>, M. Makowska<sup>b</sup>, A. Drewniak<sup>a</sup>, G. Cempura<sup>c</sup>, P. Jasiński<sup>a</sup>, S. Molin<sup>a</sup>

<sup>a</sup> Advanced Materials Centre, Faculty of Electronics, Telecommunications and Informatics, Gdańsk University of Technology, 80-233 Gdańsk, Poland

<sup>b</sup> Laboratory for Nuclear Materials, Laboratory for Synchrotron Radiation and Femtochemistry, Paul Scherrer Institut, Villigen, Switzerland

<sup>c</sup> AGH University of Science and Technology, Faculty of Metal Engineering and Industrial Computer Science, International Centre of Electron Microscopy for Materials Science, al. Mickiewicza 30, 30-059 Krakow, Poland

Table S.1. Chemical composition of the alloys given by the producer

| Target composition | Fe   | Analyzed chemical composition, % [information from the producer] |      |      |      |      |      |      |      |      |      |
|--------------------|------|------------------------------------------------------------------|------|------|------|------|------|------|------|------|------|
|                    |      | Cr                                                               | Mn   | Mo   | Ni   | Cu   | Si   | Nb   | C    | O    | N    |
| Fe20Cr             | Bal. | 20.0                                                             | 0.03 | 0.02 | 0.07 | 0.03 | 0.08 | 0.02 | 0.01 | 0.03 | 0.01 |
| Fe22Cr             | Bal. | 22.0                                                             | 0.23 | 0.01 | 0.03 | 0.02 | 0.08 | 0.02 | 0.04 | 0.58 | 0.07 |
| Fe27Cr             | Bal. | 27.0                                                             | 0.30 | 0.04 | 0.01 | 0.00 | 0.08 | 0.02 | 0.01 | 0.03 | 0.02 |

Table S.2. Pores statistic obtained from SEM images analysis

| Alloy (magnification) | Range of equivalent diameter [μm] | Average equivalent diameter [μm] | Median equivalent diameter [μm] | Porosity [%] |
|-----------------------|-----------------------------------|----------------------------------|---------------------------------|--------------|
| Fe20Cr (1500x)        | 1.76 – 70.1                       | 12.4                             | 7.47                            | 29.40        |
| Fe20Cr (2500x)        | 1.06 – 71.2                       | 11.2                             | 6.09                            | 29.58        |
| Fe22Cr (1500x)        | 1.76 – 74.4                       | 11.2                             | 6.84                            | 27.68        |
| Fe22Cr (2500x)        | 1.11 – 58.6                       | 10.9                             | 6.82                            | 27.33        |
| Fe27Cr (1500x)        | 1.76 – 77.4                       | 10.2                             | 5.90                            | 26.64        |
| Fe27Cr (2500x)        | 1.08 – 65.2                       | 11.5                             | 7.45                            | 29.37        |

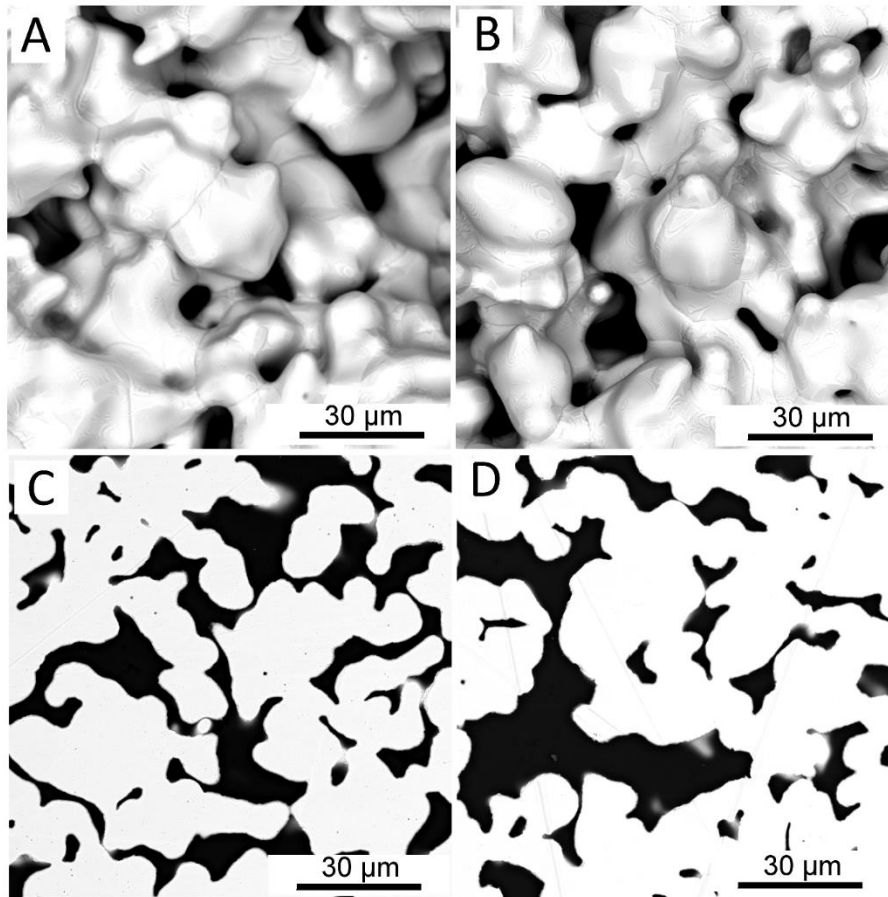

Figure S.1. SEM images of non-oxidised A) surface, C) cross-section of Fe20Cr alloy and B) surface, D) cross-section of Fe27Cr alloy.

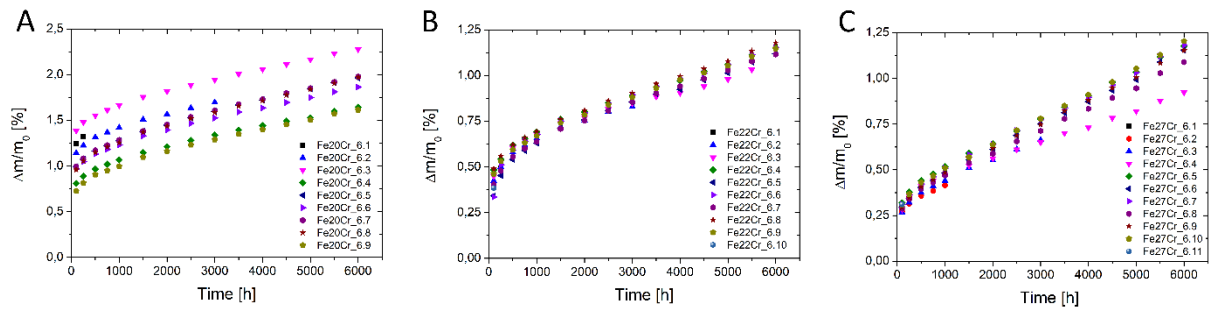

Figure S.2. The mass gain of the individual A) Fe20Cr B) Fe22Cr and C) Fe27Cr specimens oxidised at 600°C.

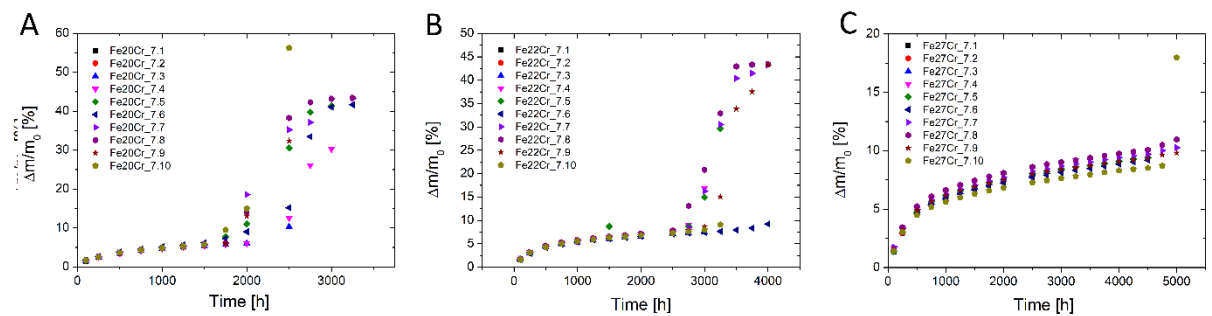

Figure S.3. The mass gain of the individual A) Fe20Cr B) Fe22Cr and C) Fe27Cr specimens oxidised at 700°C.

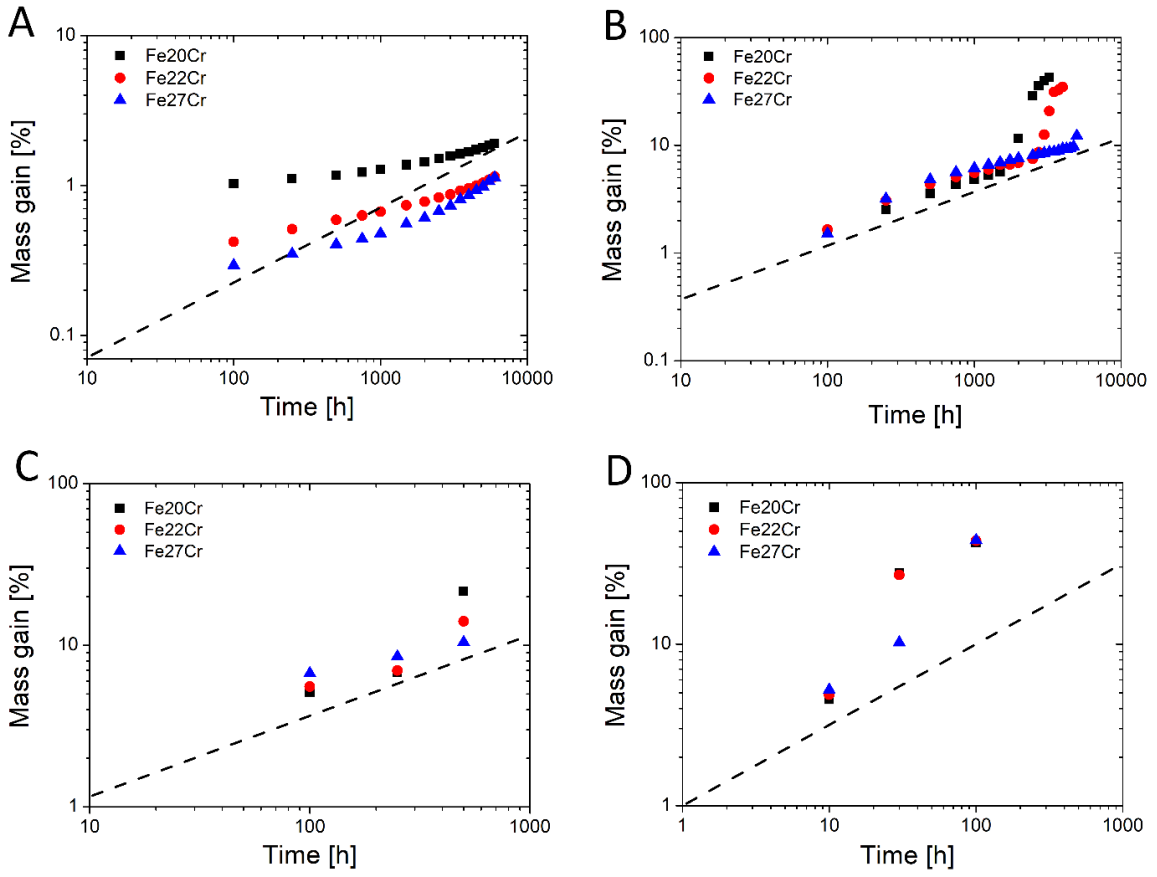

Figure S.4. The log-log plot of mass gain data for Fe20Cr, Fe22Cr and Fe27Cr oxidised at A) 600°C, B) 700°C, C) 800°C and D) 900°C. The dash lines represent 0.5 slope lines.

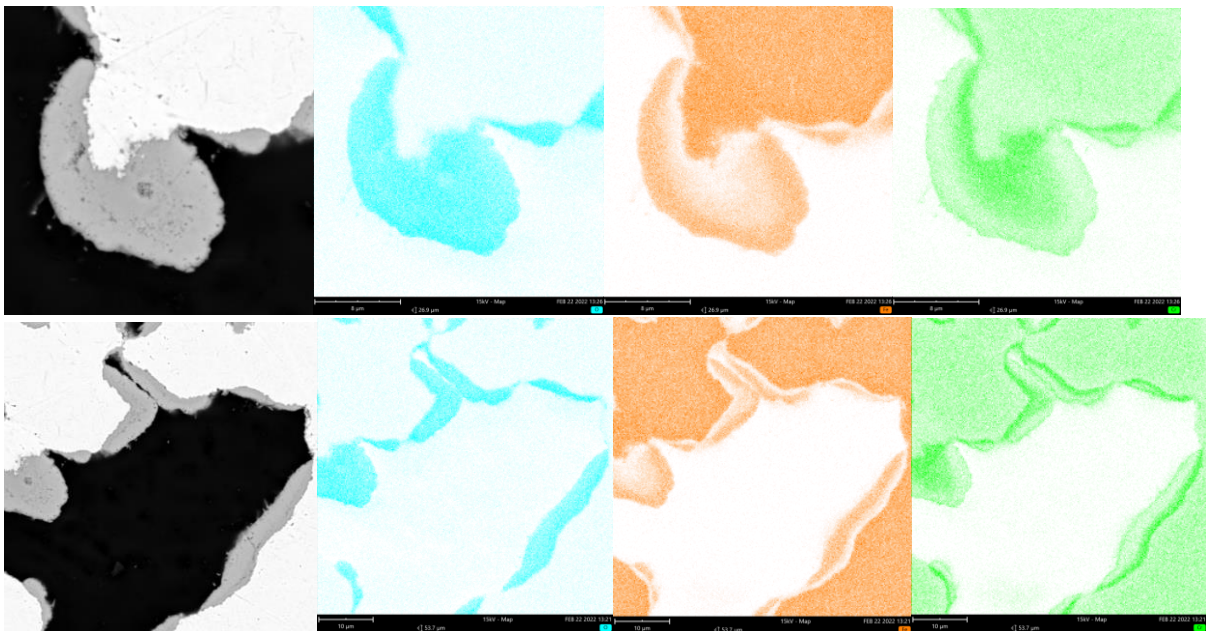

Figure S.5. EDX analysis of Fe20Cr alloy after 6000 h oxidation at 600°C.

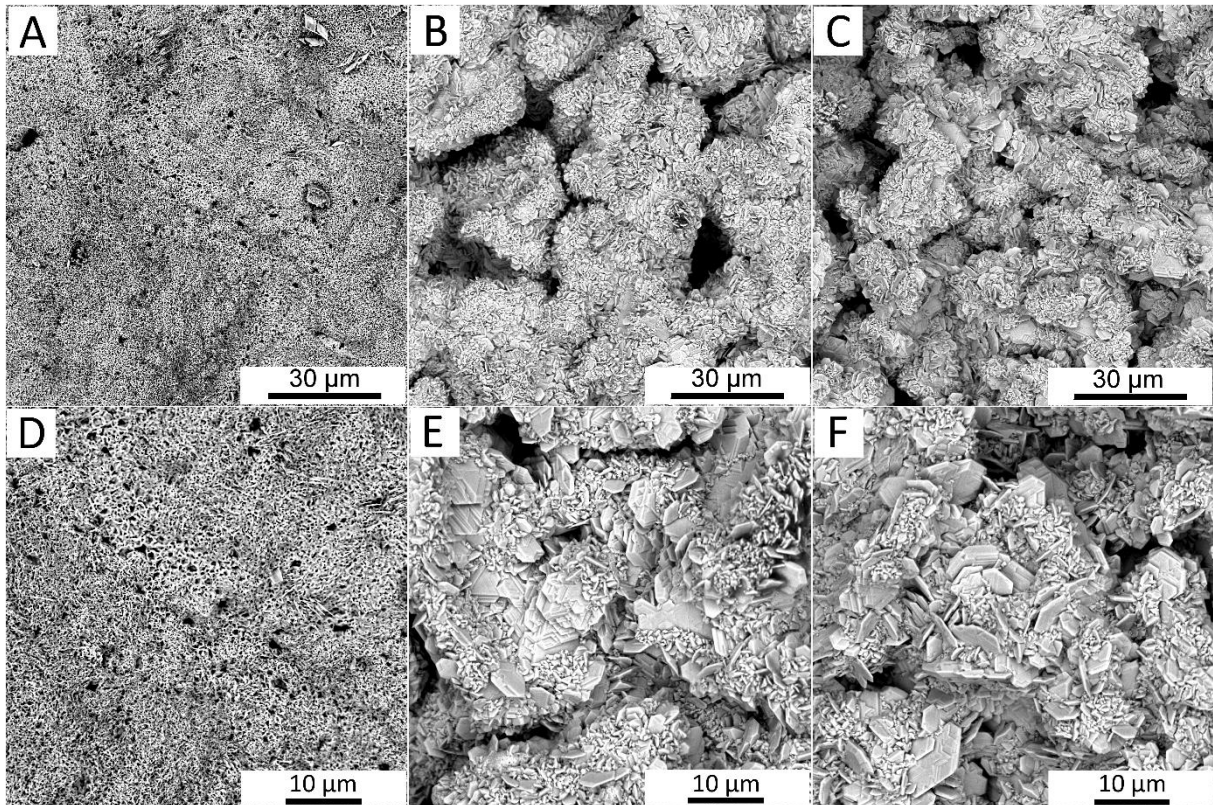

Figure S.6. SEM images of A, C) Fe<sub>20</sub>Cr, B, E) Fe<sub>22</sub>Cr and C, F) Fe<sub>27</sub>Cr alloy surface after oxidation at 700°C for 3000 h.

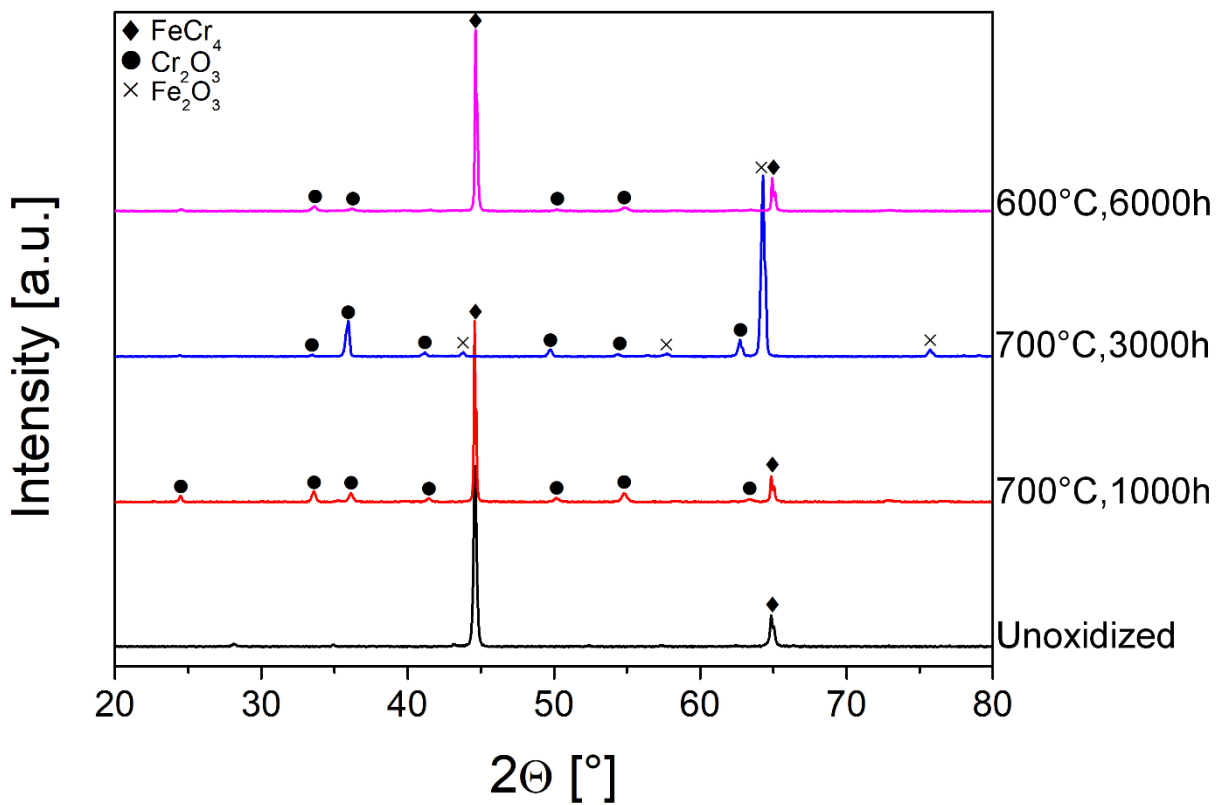

Figure S.7. XRD patterns of the reference Fe<sub>22</sub>Cr alloy and after different steps of oxidation.
